# Supplementary material for: Development of a protocol for the auto-generation of explicit aqueous-phase oxidation schemes of organic compounds
Source: Copernicus journal article supplement (doi:10.5194/acp-19-9209-2019), 2019-07-19
Supplement: Supplementary file 1 [file acp-19-9209-2019-supplement.zip]

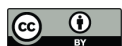

## *Supplement of*

# **Development of a protocol for the auto-generation of explicit aqueous-phase oxidation schemes of organic compounds**

**Peter Bräuer et al.**

*Correspondence to:* Hartmut Herrmann ([herrmann@tropos.de](mailto:herrmann@tropos.de))

- [acp-19-9209-2019-supplement-title-page.pdf](#)
- ESM
  - .DS\_Store
  - ESM.docx
  - RXNo4.sys
- \_\_MACOSX
  - ESM
    - \* .\_DS\_Store
    - \* .\_ESM.docx
    - \* .\_RXNo4.sys

The copyright of individual parts of the supplement might differ from the CC BY 4.0 License.
